# Supplementary material for: A Mobile Game Platform for Improving Social Communication in Children with Autism: A Feasibility Study
Source: PubMed Central journal article supplement — Appl Clin Inform. 2021 Nov 17;12(5):1030–40. doi: 10.1055/s-0041-1736626 (PMC8598393; doi:10.1055/s-0041-1736626), 2021-11-17
Supplement: 10-1055-s-0041-1736626-s210159ra.pdf [file 10-1055-s-0041-1736626-s210159ra.pdf]

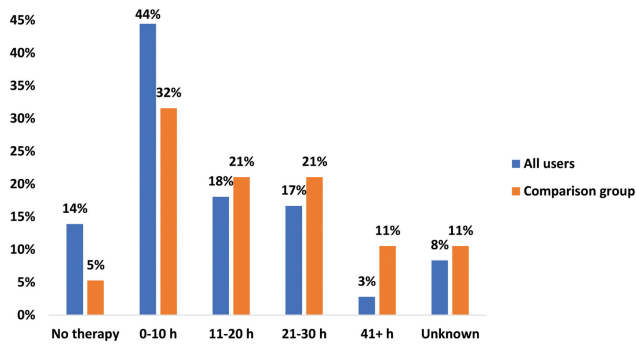

**Supplementary Fig. 1** Comparison of outside autism-related therapy intensity among all 72 GuessWhat users and the 19-person comparison group. Sixty-two (86%) GuessWhat players and 18 (95%) non-players received some form of outside therapy. Six (8%) GuessWhat users and two (11%) comparison participants did not provide information on therapy intensity.

**Supplementary Table S1** Change in all parent-reported survey scores by user group. Results include 72 families who played *GuessWhat* and a comparison group of 19 who did play *GuessWhat* but who completed all other procedures. Reductions in SRS-2 and increases in VABS-II scores indicate improvement

| Measure                             | Mean change from pre-test to post-test (SD) |                              |                                 |                         |                                       |                         |                           |             |
|-------------------------------------|---------------------------------------------|------------------------------|---------------------------------|-------------------------|---------------------------------------|-------------------------|---------------------------|-------------|
|                                     | All treated players                         | p-Value                      | Users treated with ≥28 sessions | p-Value                 | Users with 4-wk treatment consistency | p-Value                 | Comparison group          | p-Value     |
| <b>SRS-2 T-scores</b>               |                                             |                              |                                 |                         |                                       |                         |                           |             |
| Awareness                           | -1.86 (SD = 6.74)                           | 0.01 <sup>a</sup>            | -4.42 (SD = 7.52)               | 0.03 <sup>a</sup>       | -1.62 (SD = 6.71)                     | 0.22                    | -4.93 (SD = 8.28)         | 0.14        |
| Cognition                           | -3.42 (SD = 5.13)                           | <0.001 <sup>c</sup>          | -2.94 (SD = 7.67)               | 0.13                    | -1.77 (SD = 6.10)                     | 0.02 <sup>a</sup>       | -1.89 (SD = 6.4)          | 0.23        |
| Communication                       | -3.61 (SD = 6.01)                           | <0.001 <sup>c</sup>          | -4.00 (SD = 5.57)               | 0.009 <sup>b</sup>      | -3.69 (SD = 4.05)                     | 0.04 <sup>a</sup>       | -3.85 (SD = 7.29)         | 0.15        |
| Motivation                          | -3.17 (SD = 7.19)                           | <0.001 <sup>c</sup>          | -1.30 (SD = 6.85)               | 0.45                    | -0.38 (SD = 8.71)                     | 0.07                    | -1.4 (SD = 7.33)          | 0.63        |
| RRB                                 | -3.18 (SD = 7.53)                           | <0.001 <sup>c</sup>          | -4.48 (SD = 7.63)               | 0.03 <sup>a</sup>       | -3.54 (SD = 7.03)                     | 0.11                    | -3.72 (SD = 10.22)        | 0.14        |
| <b>Total</b>                        | <b>-3.97 (SD = 4.92)</b>                    | <b>&lt;0.001<sup>c</sup></b> | <b>-3.82 (SD = 5.70)</b>        | <b>0.01<sup>a</sup></b> | <b>-2.85 (SD = 4.56)</b>              | <b>0.03<sup>a</sup></b> | <b>-4.71 (SD = 7.92)</b>  | <b>0.10</b> |
| <b>VABS-II V-scores</b>             |                                             |                              |                                 |                         |                                       |                         |                           |             |
| Receptive communication             | 0.61 (SD = 2.34)                            | 0.003 <sup>b</sup>           | 1.53 (SD = 1.74)                | 0.002 <sup>b</sup>      | 1.00 (SD = 1.63)                      | 0.35                    | -0.52 (SD = 2.15)         | 0.45        |
| Expressive communication            | 0.69 (SD = 2.03)                            | 0.16                         | 0.77 (SD = 2.31)                | 0.19                    | 0.85 (SD = 1.28)                      | 0.61                    | 0.5 (SD = 2.67)           | 0.43        |
| Socialization relationships         | 0.76 (SD = 2.13)                            | 0.06                         | 0.19 (SD = 1.46)                | 0.73                    | 1.08 (SD = 2.02)                      | 0.61                    | 0.16 (SD = 2.73)          | 0.57        |
| Socialization play                  | 0.84 (SD = 2.67)                            | 0.005 <sup>b</sup>           | -0.05 (SD = 2.7)                | 0.28                    | 1.54 (SD = 2.3)                       | 0.51                    | 0.21 (SD = 3.24)          | 1.00        |
| Socialization adaptive              | 0.47 (SD = 2.02)                            | 0.019 <sup>a</sup>           | 0.53 (SD = 1.97)                | 0.29                    | 0.77 (SD = 2.13)                      | 0.49                    | 1.17 (SD = 2.36)          | 0.31        |
| <b>Socialization standard score</b> | <b>5.27 (SD = 9.29)</b>                     | <b>0.002<sup>b</sup></b>     | <b>6.21 (SD = 8.13)</b>         | <b>0.11</b>             | <b>5.46 (SD = 6.75)</b>               | <b>0.58</b>             | <b>-1.61 (SD = 12.37)</b> | <b>0.62</b> |

<sup>a</sup>p < 0.05.

<sup>b</sup>p < 0.01.

<sup>c</sup>p < 0.001 between cohorts from a two-tailed paired sample t-test.
